# Supplementary material for: Evaluation of Internet-Connected Real-Time Remote Auscultation: An Open-Label Randomized Controlled Pilot Trial
Source: MDPI journal article supplement (doi:10.3390/jpm12121950), 2022-11-24
Supplement: s1 [file s1]

Evaluation of Internet-Connected Real-Time Remote Auscultation:  
An Open-Label Randomized Controlled Pilot Trial

Day \_\_\_\_\_ Sex \_\_\_\_\_  
Age \_\_\_\_\_ Year \_\_\_\_\_  
group classical auscultation • remote auscultation (4G • Pocket Wifi • LAN)

1. ☐Normal, ☐S3 gallop, ☐Aortic stenosis (AS),  
☐Aortic regurgitation (AR), ☐Mitral regurgitation (MR)
2. ☐Normal, ☐S3 gallop, ☐Aortic stenosis (AS),  
☐Aortic regurgitation (AR), ☐Mitral regurgitation (MR)
3. ☐Normal, ☐S3 gallop, ☐Aortic stenosis (AS),  
☐Aortic regurgitation (AR), ☐Mitral regurgitation (MR)
4. ☐Normal, ☐S3 gallop, ☐Aortic stenosis (AS),  
☐Aortic regurgitation (AR), ☐Mitral regurgitation (MR)
5. ☐Normal, ☐S3 gallop, ☐Aortic stenosis (AS),  
☐Aortic regurgitation (AR), ☐Mitral regurgitation (MR)

\*\*\*\*\*

6. ☐Normal, ☐Wheeze, ☐Rhonchi, ☐fine, ☐coarse
7. ☐Normal, ☐Wheeze, ☐Rhonchi, ☐fine, ☐coarse
8. ☐Normal, ☐Wheeze, ☐Rhonchi, ☐fine, ☐coarse
9. ☐Normal, ☐Wheeze, ☐Rhonchi, ☐fine, ☐coarse
10. ☐Normal, ☐Wheeze, ☐Rhonchi, ☐fine, ☐coarse

Figure S1. Questionnaire format for the identification of the cardiopulmonary sounds.
